# Supplementary material
Source: HighWire-hosted journal article supplement (https://bjgpopen.org/highwire/filestream/2891/field_highwire_adjunct_files/0/bjgpopen20X101116_Supp.pdf)
Supplement: bjgpopen20X101116_Supp.pdf [file bjgpopen20X101116_Supp.pdf]

Supplementary Table 1: Descriptive statistics for 149 Upper Tier Local Authorities.

|                                                                                              | Median (Interquartile range) |
|----------------------------------------------------------------------------------------------|------------------------------|
| Incidence rate per 100,000 week 1: March 16-22                                               | 7.5 (4.1-15.4)               |
| Incidence rate per 100,000 week 2: March 23-29                                               | 21.9 (15.0-34.0)             |
| Incidence rate per 100,000 week 3: March 30-April 5                                          | 38.2 (24.4-53.0)             |
| Incidence rate per 100,000 week 4: April 6-12                                                | 35.3 (26.9-47.3)             |
| Incidence rate per 100,000 week 5: April 13-19                                               | 31.1 (21.6-42.3)             |
| Prevalence rate per 100,000 on March 15                                                      | 3.1 (1.9-6.2)                |
| Life expectancy in years, males at birth                                                     | 79.5 (78.1-80.5)             |
| Number of people per square kilometre                                                        | 1,532 (413-4,022)            |
| Percentage aged 65 or over                                                                   | 17.8 (14.1-20.5)             |
| Percentage non-white British*                                                                | 15.0 (7.7-33.7)              |
| Percentage in two highest classes of the National Statistics Socio-economic classification** | 29.8 (25.0-34.6)             |

\*That are mixed or multiple ethnic groups, Asian and Asian British, Black, African, Caribbean, Black British, Arab and any other ethnic (non-white) group.

\*\*That are higher and lower managerial, administrative, and professional occupations.
